# Supplementary material
Source: PubMed Central journal article supplement (PMC9343887)
Supplement: sj-pdf-1-brn-10.1177_10998004221078079.pdf [file sj-pdf-1-brn-10.1177_10998004221078079.pdf]

## Supplementary Table 1 Search Syntax

The following search strategy was utilized in PubMed, CINAHL, Embase, and PsycInfo.

|          |                                                                                                                                                                                                                                                                                                                                                                                                                                                                                                                                                                                                                                                |
|----------|------------------------------------------------------------------------------------------------------------------------------------------------------------------------------------------------------------------------------------------------------------------------------------------------------------------------------------------------------------------------------------------------------------------------------------------------------------------------------------------------------------------------------------------------------------------------------------------------------------------------------------------------|
| PubMed   | <p>("intermittent fasting" OR "intermittent fast" OR "intermittent energy restriction" OR "intermittent calorie restriction" OR "time restricted feeding" OR "time restricted feedings" OR "alternate day fasting" OR "alternate fasting" OR "modified alternate day fasting" OR "5:2 diet" OR "periodic fasting" OR "periodic fast")<br/> AND<br/> (("Obesity"[Mesh] or obesity) OR ("Overweight"[Mesh] OR overweight))<br/> AND<br/> ("Weight Loss"[Mesh] OR weight loss OR weight reduction OR weight reductions)</p>                                                                                                                       |
| CINAHL   | <p>(fasting OR intermittent fasting OR intermittent fast OR intermittent energy restriction OR intermittent calorie restriction OR time restricted feeding OR time restricted feedings OR alternate day fasting OR alternate fasting OR modified alternate day fasting OR 5:2 diet OR periodic fasting OR periodic fast)<br/> AND<br/> (obesity OR overweight)<br/> AND<br/> (weightloss OR weight reduction)</p>                                                                                                                                                                                                                              |
| Embase   | <p>('fasting'/exp OR fasting OR 'intermittent fasting'/exp OR 'intermittent fasting' OR 'intermittent fast' OR 'intermittent energy restriction'/exp OR 'intermittent energy restriction' OR 'intermittent calorie restriction' OR 'time restricted feeding'/exp OR 'time restricted feeding' OR 'time restricted feedings' OR 'alternate day fasting'/exp OR 'alternate day fasting' OR 'alternate fasting' OR 'modified alternate day fasting' OR '5:2 diet' OR 'periodic fasting' OR 'periodic fast')<br/> AND<br/> ('obesity'/exp OR obesity OR 'overweight'/exp OR overweight)<br/> AND<br/> ('weightloss' OR 'weight reduction'/exp)</p> |
| PsycInfo | <p>(fasting OR "intermittent fasting" OR "intermittent fast" OR "intermittent energy restriction" OR "intermittent calorie restriction" OR "time restricted feeding" OR "time restricted feedings" OR "alternate day fasting" OR "alternate fasting" OR "modified alternate day fasting" OR "5:2 diet" OR "periodic fasting" OR "periodic fast")<br/> AND<br/> (obesity OR overweight)<br/> AND<br/> (weight loss OR weight reduction)</p>                                                                                                                                                                                                     |

**Supplementary Table 2** Characteristics of Randomized Controlled Trials

| Author (year)                                | Country        | Duration (follow-up) | Regimen                                                                                                                                                                                                | Matched Diets? (yes/no) | Protocol                   |                                           |                                                                    | N <sup>1</sup>  | Attrition <sup>2</sup> , % | Baseline Characteristics  |               |                           |                            |
|----------------------------------------------|----------------|----------------------|--------------------------------------------------------------------------------------------------------------------------------------------------------------------------------------------------------|-------------------------|----------------------------|-------------------------------------------|--------------------------------------------------------------------|-----------------|----------------------------|---------------------------|---------------|---------------------------|----------------------------|
|                                              |                |                      |                                                                                                                                                                                                        |                         | Exercise                   | Food Provided? (yes/no)                   | Behavioral Support                                                 |                 |                            | Age, years                | Sex, % female | BMI, kg/m <sup>2</sup>    | Weight, kg                 |
| #1. Parvaresh et al. (2019) <sup>*, CA</sup> | Iran           | 8 weeks              | ADF<br>Sat, Mon, Wed -75% energy restriction<br>Sun, Tues, Thurs - 100% calorie needs<br>Fri – Ad libitum                                                                                              | No                      | Maintain regular PA levels | No                                        | None specified                                                     | 35 <sup>a</sup> | 0.0                        | 44.6 (9.08) <sup>SD</sup> | 40.0          | 31.1 (3.35) <sup>SD</sup> | 86.7 (10.65) <sup>SD</sup> |
|                                              |                |                      | CER<br>Consume 75% energy needs daily                                                                                                                                                                  |                         | Maintain regular PA levels | No                                        | None specified                                                     | 35 <sup>a</sup> | 2.9                        | 46.4 (7.94) <sup>SD</sup> | 41.2          | 31.6 (3.82) <sup>SD</sup> | 84.2 (12.21) <sup>SD</sup> |
| #2. Beaulieu et al. (2020) <sup>ITT</sup>    | United Kingdom | 12 weeks             | ADF<br>Consume 25% energy needs on fast days through total diet replacements with alternating days of ad libitum                                                                                       | No                      | Maintain regular PA levels | Yes                                       | Weekly meetings with dietitian                                     | 24              | 25.0                       | 35 (11) <sup>SD</sup>     | 100.0         | 29.4 (2.5) <sup>SD</sup>  | 81.2 (13.0) <sup>SD</sup>  |
|                                              |                |                      | CER<br>Consume 75% energy needs daily                                                                                                                                                                  |                         | Maintain regular PA levels | Yes                                       | Weekly meetings with dietitian                                     | 22              | 9.1                        | 34 (9) <sup>SD</sup>      | 100.0         | 28.9 (2.3) <sup>SD</sup>  | 78.6 (10.0) <sup>SD</sup>  |
| #3. Catenacci et al. (2016) <sup>CA</sup>    | United States  | 8 weeks (24 weeks)   | ADF<br>Consume only water, calorie-free beverages, and stock cube soup on fast days with alternating days of provided diet that meet energy requirements and ad libitum access to 200kcal food modules | No                      | Maintain regular PA levels | Provided during 8 weeks intervention only | received standardized weight maintenance advice after intervention | 15 <sup>a</sup> | 6.7                        | 39.6 (9.5) <sup>SD</sup>  | 76.9          | 35.8 (3.7) <sup>SD</sup>  | 94.7 (10.6) <sup>SD</sup>  |
|                                              |                |                      | CER<br>400 kcal/day deficit from estimated energy requirements                                                                                                                                         |                         | Maintain regular PA levels | Provided during 8 weeks intervention only | received standardized weight maintenance advice after intervention | 14 <sup>a</sup> | 0.0                        | 42.7 (7.9) <sup>SD</sup>  | 75.0          | 39.5 (6.0) <sup>SD</sup>  | 114.0 (20.0) <sup>SD</sup> |
| #4. Coutinho et al. (2018) <sup>CA</sup>     | Norway         | 12 weeks             | ADF<br>three nonconsecutive days of VLCD (550/660 kcal/day for women/men) and diet that meets energy needs on alternating days feed days                                                               | Yes                     | Maintain regular PA levels | No                                        | Weekly diet counseling with a trained dietitian                    | 18 <sup>a</sup> | 22.2                       | 39.4 (11.0) <sup>SD</sup> | 71.4          | 35.6 (3.2) <sup>SD</sup>  | 107.2 (13.6) <sup>SD</sup> |
|                                              |                |                      | CER                                                                                                                                                                                                    |                         | Maintain                   | No                                        | Weekly diet                                                        | 17 <sup>a</sup> | 17.6                       | 39.1                      | 85.7          | 35.1                      | 97.5                       |

|                                                                                               |               |                    |                                                                                                                                                  |         |                            |                                 |                                            |                 |      |                           |       |                           |                            |
|-----------------------------------------------------------------------------------------------|---------------|--------------------|--------------------------------------------------------------------------------------------------------------------------------------------------|---------|----------------------------|---------------------------------|--------------------------------------------|-----------------|------|---------------------------|-------|---------------------------|----------------------------|
|                                                                                               |               |                    | low calorie diet daily                                                                                                                           |         | regular PA levels          |                                 | counseling with a trained dietitian        |                 |      | (9.0) <sup>SD</sup>       |       | (4.2) <sup>SD</sup>       | (12.8) <sup>SD</sup>       |
| #5 a. Hutchison et al. (2019) <sup>CA</sup><br><br>#5 b. Liu et al. (2019) <sup>2nd, CA</sup> | Australia     | 8 weeks            | ADF with 100% energy requirements per week three nonconsecutive days of fasting with alternating fed days providing ~145% energy requirements    |         | Maintain regular PA levels | Yes                             | Weekly individual counseling               | 25              | 12.0 | 51.0 (2) <sup>SE</sup>    | 100.0 | 31.2 (0.9) <sup>SE</sup>  | 84.1 (2.8) <sup>SE</sup>   |
|                                                                                               |               |                    | ADF with 70% energy requirements per week three nonconsecutive days of fasting with alternating fed days providing ~100% energy requirements     | Yes     | Maintain regular PA levels | Yes                             | Weekly individual counseling               | 25              | 12.0 | 49.0 (2.0) <sup>SE</sup>  | 100.0 | 32.4 (0.8) <sup>SE</sup>  | 89.4 (2.8) <sup>SE</sup>   |
|                                                                                               |               |                    | CER70<br>70% energy requirements daily                                                                                                           |         | Maintain regular PA levels | Yes                             | Weekly individual counseling               | 26              | 7.7  | 51.0 (2.0) <sup>SE</sup>  | 100.0 | 32.6 (1.0) <sup>SE</sup>  | 88.4 (2.8) <sup>SE</sup>   |
|                                                                                               |               |                    | Control<br>100% energy requirements daily                                                                                                        |         | Maintain regular PA levels | Yes                             | Weekly individual counseling               | 12              | 8.3  | 49.0 (3.0) <sup>SE</sup>  | 100.0 | 30.9 (1.5) <sup>SE</sup>  | 83.8 (4.8) <sup>SE</sup>   |
| #6. Bowen et al. (2018) <sup>CA</sup>                                                         | Australia     | 16 weeks (8 weeks) | ADF<br>Tues, Thurs, Sun: 2400kJ+55g protein, a modified fasting meal replacement program<br>Mon, Wed, Fri: 5000kJ+102 protein<br>Sat: ad libitum | Unclear | Maintain regular PA levels | Provided meal replacements only | Biweekly individual meeting with dietitian | 82              | 18.3 | 40.0 (8.3) <sup>SD</sup>  | 81.7  | 35.7 (5.8) <sup>SD</sup>  | 100.6 (19.6) <sup>SD</sup> |
|                                                                                               |               |                    | CER<br>daily energy restriction meal replacement program                                                                                         |         | Maintain regular PA levels | Provided meal replacements only | Biweekly individual meeting with dietitian | 81              | 16.0 | 40.6 (8.8) <sup>SD</sup>  | 80.2  | 35.5 (5.5) <sup>SD</sup>  | 99.6 (15.6) <sup>SD</sup>  |
| #7. Razavi et al. (2020) <sup>*, CA</sup>                                                     | Iran          | 16 weeks           | ADF<br>Sat, Mon, Wed: VLCD of 75% energy restriction<br>Sun, Tues, Thurs, Fri: ad libitum                                                        | No      | Maintain regular PA levels | Provided fast day meals only    | Phone interviews during the week           | 40 <sup>a</sup> | 5    | 41.3 (8.65) <sup>SD</sup> | 40.0  | 31.3 (3.12) <sup>SD</sup> | 89.4 (7.72) <sup>SD</sup>  |
|                                                                                               |               |                    | CER<br>Consume 75% energy needs daily                                                                                                            |         | Maintain regular PA levels | No                              | Phone interviews during the week           | 40 <sup>a</sup> | 7.5  | 43.1 (9.26) <sup>SD</sup> | 41.2  | 31.2 (3.95) <sup>SD</sup> | 87.1 (8.17) <sup>SD</sup>  |
| #8 a. Trepanowski et al.                                                                      | United States | 52 weeks           | ADF<br>Consume 25% energy requirements at lunch time on fast days and 125% energy                                                                | Yes     | Maintain regular PA levels | Provided for 12                 | Met individually with dietitian            | 34              | 38.2 | 44.0 (10.0) <sup>SD</sup> | 88.2  | 34.0 (4.0) <sup>SD</sup>  | 95.0 (13.0) <sup>SD</sup>  |

|                                                                                                                                                                                                                                                                          |               |          |                                                                                                  |     |                            |                                            |                                     |                 |                 |                          |                          |                          |                          |                                                                     |    |      |                           |      |                          |                            |
|--------------------------------------------------------------------------------------------------------------------------------------------------------------------------------------------------------------------------------------------------------------------------|---------------|----------|--------------------------------------------------------------------------------------------------|-----|----------------------------|--------------------------------------------|-------------------------------------|-----------------|-----------------|--------------------------|--------------------------|--------------------------|--------------------------|---------------------------------------------------------------------|----|------|---------------------------|------|--------------------------|----------------------------|
| (2017) <sup>111</sup><br>#8 b.<br>Trepanowski et al.<br>(2018) <sup>2nd</sup> , CA<br>#8 c.<br>Barnosky et al.<br>(2017) <sup>X</sup> , 2nd, CA<br>#8 d.<br>Gabel et al.<br>(2019) <sup>#, X</sup> , 2nd, CA<br>#8 e.<br>Miranda et al.<br>(2018) <sup>X</sup> , 2nd, CA |               |          | requirements on alternating feed days                                                            |     |                            | wks only                                   | or nutritionist weekly after 12 wks |                 |                 |                          |                          |                          |                          |                                                                     |    |      |                           |      |                          |                            |
|                                                                                                                                                                                                                                                                          |               |          | CER<br>consume 75% energy requirements daily                                                     |     |                            | Maintain regular PA levels                 | Provided for 12 wks only            |                 |                 |                          |                          |                          |                          | Met individually with dietitian or nutritionist weekly after 12 wks | 35 | 28.6 | 43.0 (12.0) <sup>SD</sup> | 82.9 | 35.0 (4.0) <sup>SD</sup> | 101.0 (16.0) <sup>SD</sup> |
|                                                                                                                                                                                                                                                                          |               |          | Control<br>Maintain regular diet                                                                 |     |                            | Maintain regular PA levels                 | No                                  |                 |                 |                          |                          |                          |                          | No                                                                  | 35 | 22.9 | 44.0 (11.0) <sup>SD</sup> | 77.1 | 34.0 (4.0) <sup>SD</sup> | 92.0 (16.0) <sup>SD</sup>  |
| #9.<br>Varady et al.<br>(2011) <sup>CA</sup>                                                                                                                                                                                                                             | United States | 12 weeks | ADF<br>75% energy restriction on fast days consumed at lunch with alternating days of ad libitum | No  | Maintain regular PA habits | Provided fast day meals only               | None specified                      | 15 <sup>a</sup> | 13.3            | 47.0 (2.0) <sup>SE</sup> | 76.9                     | 32.0 (2.0) <sup>SE</sup> | NR                       |                                                                     |    |      |                           |      |                          |                            |
|                                                                                                                                                                                                                                                                          |               |          | CER<br>25% energy restriction daily                                                              |     |                            | Maintain regular PA habits                 | Yes                                 | None specified  | 15 <sup>a</sup> | 20.0                     | 47.0 (3.0) <sup>SE</sup> | 83.3                     | 32.0 (2.0) <sup>SE</sup> | NR                                                                  |    |      |                           |      |                          |                            |
|                                                                                                                                                                                                                                                                          |               |          | Exercise<br>Ad libitum diet                                                                      |     |                            | Moderate intensity exercise 3 times a week | No                                  | None specified  | 15 <sup>a</sup> | 20.0                     | 46.0 (3.0) <sup>SE</sup> | 83.3                     | 33.0 (1.0) <sup>SE</sup> | NR                                                                  |    |      |                           |      |                          |                            |
|                                                                                                                                                                                                                                                                          |               |          | Control<br>Ad libitum diet                                                                       |     |                            | Maintain regular PA habits                 | No                                  | None specified  | 15 <sup>a</sup> | 20.0                     | 46.0 (3.0) <sup>SE</sup> | 83.3                     | 32.0 (2.0) <sup>SE</sup> | NR                                                                  |    |      |                           |      |                          |                            |
| #10 a.<br>Bhutani et                                                                                                                                                                                                                                                     | United States | 12 weeks | ADF<br>Consumed 25% of energy needs from 12:00-14:00 on                                          | Yes | Maintain regular           | Provided                                   | Met with dietician                  | 25              | 36.0            | 42.0 (2.0) <sup>SE</sup> | 96.0                     | 35.0 (1.0) <sup>SE</sup> | 94.0 (3.0) <sup>SE</sup> |                                                                     |    |      |                           |      |                          |                            |

|                                                                                                                                                          |               |         |                                                                                                                                 |     |                                            |                                            |                                               |                                               |                 |                          |                           |                          |                           |                           |      |                          |                          |                          |                          |                          |
|----------------------------------------------------------------------------------------------------------------------------------------------------------|---------------|---------|---------------------------------------------------------------------------------------------------------------------------------|-----|--------------------------------------------|--------------------------------------------|-----------------------------------------------|-----------------------------------------------|-----------------|--------------------------|---------------------------|--------------------------|---------------------------|---------------------------|------|--------------------------|--------------------------|--------------------------|--------------------------|--------------------------|
| al.<br>(2013) <sup>ITT</sup><br><br>#10 b.<br>Bhutani et al.<br>(2013) <sup>2nd, ITT</sup><br><br>#10 c.<br>Bhutani et al.<br>(2013) <sup>2nd, ITT</sup> |               |         | fast days and ad libitum on fast days                                                                                           |     | PA habits                                  | fast day meals only for 4wks               | weekly                                        |                                               |                 |                          |                           |                          |                           |                           |      |                          |                          |                          |                          |                          |
|                                                                                                                                                          |               |         | ADF with exercise<br>Consume 25% of energy needs from 12:00-14:00 on fast days and ad libitum on fast days                      |     | Moderate intensity exercise 3 times a week | Provided fast day meals only for 4wks      | Met with dietician weekly                     |                                               |                 |                          |                           |                          |                           | 18                        | 11.1 | 45.0 (5.0) <sup>SE</sup> | 100.0                    | 35.0 (1.0) <sup>SE</sup> | 91.0 (6.0) <sup>SE</sup> |                          |
|                                                                                                                                                          |               |         | Exercise<br>Maintain regular diet                                                                                               |     |                                            | Moderate intensity exercise 3 times a week | No                                            |                                               |                 |                          |                           |                          |                           | No                        | 24   | 33.3                     | 42.0 (2.0) <sup>SE</sup> | 95.8                     | 35.0 (1.0) <sup>SE</sup> | 93.0 (2.0) <sup>SE</sup> |
|                                                                                                                                                          |               |         | Control<br>Maintain regular diet                                                                                                |     |                                            | Maintain regular PA habits                 | No                                            |                                               |                 |                          |                           |                          |                           | No                        | 16   | 0.0                      | 49.0 (2.0) <sup>SE</sup> | 93.8                     | 35.0 (1.0) <sup>SE</sup> | 93.0 (5.0) <sup>SE</sup> |
| #11. Cho et al. (2019) <sup>CA, ^</sup>                                                                                                                  | Korea         | 8 weeks | ADF<br>Consumed 25% of energy needs (~500kcal) consumed from 12:00-14:00 on fast days and ad libitum on feed days               | Yes | Maintain regular PA habits                 | No                                         | 24 hour dietary recall method was implemented | 26 <sup>a</sup>                               | 26.9            | 33.5 (5.0) <sup>SD</sup> | 75.0                      | 27.8 (3.4) <sup>SD</sup> | 74.6 (13.7) <sup>SD</sup> |                           |      |                          |                          |                          |                          |                          |
|                                                                                                                                                          |               |         | ADF with exercise<br>Consumed 25% of energy needs (~500kcal) consumed from 12:00-14:00 on fast days and ad libitum on feed days |     | Moderate intensity exercise 3 times a week | No                                         | 24 hour dietary recall method was implemented | 28 <sup>a</sup>                               | 25              | 34.5 (5.7) <sup>SD</sup> | 44.4                      | 28.0 (2.6) <sup>SD</sup> | 78.2 (14.5) <sup>SD</sup> |                           |      |                          |                          |                          |                          |                          |
|                                                                                                                                                          |               |         | Exercise<br>NR                                                                                                                  |     |                                            | Moderate intensity exercise 3 times a week | No                                            | 24 hour dietary recall method was implemented | 24 <sup>a</sup> | 29.2                     | 38.6 (8.2) <sup>SD</sup>  | 44.4                     | 26.9 (3.9) <sup>SD</sup>  | 74.2 (13.2) <sup>SD</sup> |      |                          |                          |                          |                          |                          |
|                                                                                                                                                          |               |         | Control<br>Maintain regular diet                                                                                                |     |                                            | Maintain regular PA habits                 | No                                            | 24 hour dietary recall method was implemented | 22 <sup>a</sup> | 27.3                     | 42.6 (10.6) <sup>SD</sup> | 66.6                     | 25.8 (3.4) <sup>SD</sup>  | 71.1 (11.7) <sup>SD</sup> |      |                          |                          |                          |                          |                          |
| #12. Hoddy et al. (2014) <sup>CA</sup>                                                                                                                   | United States | 8 weeks | ADF with small meal at lunch<br>Consumed 25% of energy needs from 12:00-14:00 on                                                | Yes | Maintain regular PA habits                 | Provided fast day                          | None specified                                | 24 <sup>a</sup>                               | 16.7            | 46.0 (3.0) <sup>SE</sup> | 85.0                      | 35.0 (1.0) <sup>SE</sup> | 94.0 (2.0) <sup>SE</sup>  |                           |      |                          |                          |                          |                          |                          |

|                                                      |                |                          |                                                                                                                                                               |     |                            |                                   |                                                                                                |                 |      |                          |       |                          |                          |
|------------------------------------------------------|----------------|--------------------------|---------------------------------------------------------------------------------------------------------------------------------------------------------------|-----|----------------------------|-----------------------------------|------------------------------------------------------------------------------------------------|-----------------|------|--------------------------|-------|--------------------------|--------------------------|
|                                                      |                |                          | fast days and ad libitum on feed days                                                                                                                         |     |                            | meals only                        |                                                                                                |                 |      |                          |       |                          |                          |
|                                                      |                |                          | ADF with small meal at dinner<br>Consumed 25% of energy needs from 12:00-14:00 on fast days and ad libitum on feed days                                       |     | Maintain regular PA habits | Provided fast day meals only      | None specified                                                                                 | 25 <sup>a</sup> | 24.0 | 45.0 (3.0) <sup>SE</sup> | 78.9  | 34.0 (1.0) <sup>SE</sup> | 97.0 (3.0) <sup>SE</sup> |
|                                                      |                |                          | ADF with small meals throughout the day<br>Consumed 25% of energy needs from 6:00-8:00, 12:00-14:00, and 18:00-20:00 on fast days and ad libitum on feed days |     | Maintain regular PA habits | Provided fast day meals only      | None specified                                                                                 | 25 <sup>a</sup> | 20.0 | 46.0 (2.0) <sup>SE</sup> | 90.0  | 34.0 (1.0) <sup>SE</sup> | 90.0 (2.0) <sup>SE</sup> |
| #13 a.<br>Klempel et al. (2013) <sup>CA</sup>        | United States  | 8 weeks                  | ADF with high fat diet<br>Consumed 25% of energy needs from 12:00-14:00 on fast day and 125% of energy needs with 45% fat on feed days                        | Yes | Maintain regular PA habits | Yes                               | None specified                                                                                 | 17 <sup>a</sup> | 11.8 | 42.4 (3.0) <sup>SE</sup> | 100.0 | 35.3 (0.7) <sup>SE</sup> | 91.5 (2.6) <sup>SE</sup> |
| #13 b.<br>Klempel et al. (2013) <sup>CA</sup>        |                |                          | ADF with low fat diet<br>Consumed 25% of energy needs from 12:00-14:00 on fast day and 125% of energy needs with 25% fat on feed days                         |     | Maintain regular PA habits | Yes                               | None specified                                                                                 | 18 <sup>a</sup> | 5.6  | 43.2 (2.3) <sup>SE</sup> | 100.0 | 35.5 (0.7) <sup>SE</sup> | 91.5 (2.9) <sup>SE</sup> |
| #13 c.<br>Klempel et al. (2013) <sup>2nd, CA</sup>   |                |                          |                                                                                                                                                               |     |                            |                                   |                                                                                                |                 |      |                          |       |                          |                          |
| #13 d.<br>Varady et al. (2015) <sup>X, 2nd, CA</sup> |                |                          |                                                                                                                                                               |     |                            |                                   |                                                                                                |                 |      |                          |       |                          |                          |
| #14.<br>Antoni et al. (2018) <sup>CA</sup>           | United Kingdom | Max duration of 36 weeks | 5:2 consume 25% energy needs through food packs on two consecutive fast days and healthy diet on five feed days                                               | Yes | Maintain regular PA habits | Provided fast day food packs only | fortnightly motivational phone, email, texts from study investigators and monthly face-to-face | 24 <sup>a</sup> | 37.5 | 42.0 (4.0) <sup>SE</sup> | 53.3  | 29.8 (0.9) <sup>SE</sup> | 88.8 (3.4) <sup>SE</sup> |

|                                                                         |           |                     |                                                                                                  |     |                                          |    |                                                                                                                    |                 |      |                          |      |                          |                           |
|-------------------------------------------------------------------------|-----------|---------------------|--------------------------------------------------------------------------------------------------|-----|------------------------------------------|----|--------------------------------------------------------------------------------------------------------------------|-----------------|------|--------------------------|------|--------------------------|---------------------------|
|                                                                         |           |                     |                                                                                                  |     |                                          |    | clinic appointments                                                                                                |                 |      |                          |      |                          |                           |
|                                                                         |           |                     | CER consume 2510kJ below energy needs                                                            |     | Maintain regular PA habits               | No | fortnightly motivational phone, email, texts from study investigators and monthly face-to-face clinic appointments | 24 <sup>a</sup> | 50.0 | 48.0 (3.0) <sup>SE</sup> | 50.0 | 30.8 (1.1) <sup>SE</sup> | 89.3 (4.5) <sup>SE</sup>  |
| #15 a. Carter et al. (2018) <sup>+</sup> ITT                            | Australia | 52 weeks (52 weeks) | 5:2 consume 500-600 kcal for two nonconsecutive fast days and usual diet for remaining five days | Yes | Encourage to increase step count by 2000 | No | Met with dietitian every two wks for the first 12 wks, then every 2-3 months                                       | 70              | 27.1 | 61.0 (9.0) <sup>SD</sup> | 55.7 | 35.0 (5.8) <sup>SD</sup> | 100.0 (19) <sup>SD</sup>  |
| #15 b. Carter et al. (2019) <sup>+</sup> 2nd, ITT                       |           |                     | CER consume 1200-1500 kcal daily                                                                 |     | Encourage to increase step count by 2000 | No | Met with dietitian every two wks for the first 12 wks, then every 2-3 months                                       | 67              | 31.3 | 61.0 (9.2) <sup>SD</sup> | 56.7 | 37.0 (5.7) <sup>SD</sup> | 102.0 (17) <sup>SD</sup>  |
| #16. Carter et al. (2016) <sup>+</sup> ITT (weight and HbA1c only) + CA | Australia | 12 weeks            | 5:2 1670-2500kJ for two days with usual diet for remaining five days                             | No  | Maintain regular PA habits               | No | fortnightly appointments (12wks); if appointment missed, participants were contacted through phone or email)       | 31              | 16.1 | 61.0 (7.5) <sup>SD</sup> | 54.8 | 35.0 (4.8) <sup>SD</sup> | 99.0 (16.0) <sup>SD</sup> |
|                                                                         |           |                     | CER 5000-6500kJ daily                                                                            |     | Maintain regular PA habits               | No | fortnightly appointments (12wks); if appointment missed, participants were contacted through                       | 32              | 21.9 | 62.0 (9.1) <sup>SD</sup> | 50.0 | 36.0 (5.2) <sup>SD</sup> | 99.0 (15.0) <sup>SD</sup> |

|                                                 |           |                        |                                                                                                    |     |                            |    |                                                                                                                 |                 |     |                             |      |                             |                               |
|-------------------------------------------------|-----------|------------------------|----------------------------------------------------------------------------------------------------|-----|----------------------------|----|-----------------------------------------------------------------------------------------------------------------|-----------------|-----|-----------------------------|------|-----------------------------|-------------------------------|
|                                                 |           |                        |                                                                                                    |     |                            |    | phone or email)                                                                                                 |                 |     |                             |      |                             |                               |
| #17.<br>Conley et al.<br>(2018) <sup>CA</sup>   | Australia | 24 weeks               | 5:2<br>600 calories on two nonconsecutive fast days and ad libitum on remaining five days          | No  | Maintain regular PA habits | No | Received five individual counseling on specific dietary interventions for first 12 wks                          | 12 <sup>a</sup> | 8.3 | 68.0<br>(2.7) <sup>SE</sup> | 0.0  | 33.4<br>(1.8) <sup>SE</sup> | 99.1<br>(7.9) <sup>SE</sup>   |
|                                                 |           |                        | CER<br>500 calorie reduction from average daily energy needs daily                                 |     | Maintain regular PA habits | No | Received five individual counseling on specific dietary interventions for first 12 wks                          | 12 <sup>a</sup> | 0.0 | 67.1<br>(3.9) <sup>SE</sup> | 0.0  | 36.2<br>(4.3) <sup>SE</sup> | 107.3<br>(17.1) <sup>SE</sup> |
| #18.<br>Schübel et al.<br>(2018) <sup>ITT</sup> | Germany   | 24 weeks<br>(26 weeks) | 5:2<br>25% energy restriction on two nonconsecutive days and eucaloric diet on remaining five days | Yes | Maintain regular PA habits | No | Biweekly phone calls by dietitians during intervention phase; received longer and more comprehensive counseling | 49              | 4.1 | 49.4<br>(9.0) <sup>SD</sup> | 49.0 | 32.0<br>(3.8) <sup>SD</sup> | 96.4<br>(15.8) <sup>SD</sup>  |
|                                                 |           |                        | CER<br>Consume ~80% energy needs daily                                                             |     | Maintain regular PA habits | No | Biweekly phone calls by dietitians during intervention phase; received longer and more comprehensive counseling | 49              | 8.2 | 50.5<br>(8.0) <sup>SD</sup> | 49.0 | 31.2<br>(4.0) <sup>SD</sup> | 92.5<br>(15.7) <sup>SD</sup>  |
|                                                 |           |                        | Control<br>Maintain regular diet                                                                   |     | Maintain regular PA habits | No | Biweekly phone calls by dietitians during intervention phase;                                                   | 52              | 1.9 | 50.7<br>(7.1) <sup>SD</sup> | 52.0 | 31.1<br>(3.6) <sup>SD</sup> | 93.3<br>(13.3) <sup>SD</sup>  |



|                                             |               |           |                                                                                                                                                 |     |                                                                                |                                        |                                                                    |    |      |                           |      |                          |                            |
|---------------------------------------------|---------------|-----------|-------------------------------------------------------------------------------------------------------------------------------------------------|-----|--------------------------------------------------------------------------------|----------------------------------------|--------------------------------------------------------------------|----|------|---------------------------|------|--------------------------|----------------------------|
|                                             |               |           |                                                                                                                                                 |     |                                                                                |                                        | received longer and more comprehensive counseling                  |    |      |                           |      |                          |                            |
| #19 a. Sundfør et al. (2018) <sup>ITT</sup> | Norway        | 52 weeks  | 5:2<br>400/600 (female/male) kcal on two nonconsecutive days and usual diet on remaining five days                                              | Yes | Maintain regular PA habits                                                     | No                                     | Received dietary counseling and advised on weight loss maintenance | 54 | 7.4  | 49.9 (10.1) <sup>SD</sup> | 48.1 | 35.1 (3.9) <sup>SD</sup> | 108.6 (16.3) <sup>SD</sup> |
|                                             |               |           | CER<br>reduced energy intake evenly for total weekly energy reduction equivalent in both groups                                                 |     | Maintain regular PA habits                                                     | No                                     | Received dietary counseling and advised on weight loss maintenance | 58 | 5.2  | 47.5 (11.6) <sup>SD</sup> | 51.7 | 35.3 (3.5) <sup>SD</sup> | 107.5 (16.1) <sup>SD</sup> |
| #20. Hirsh et al. (2019)                    | United States | 7.5 weeks | 5:2<br>Mon and Tues: consume 730kcal of prepared shake four times a day<br>Wed, Thurs, Fri, Sat, Sun: maintain regular diet                     | No  | Maintain regular PA habits                                                     | Provided fast day prepared shakes only | Provided regular telephone interviews/emails                       | 10 | 0.0  | 43.4 (13.0) <sup>SD</sup> | 80.0 | 26.7 (1.9) <sup>SD</sup> | 76.3 (9.8) <sup>SD</sup>   |
|                                             |               |           | Control<br>Maintain regular diet                                                                                                                |     | Maintain regular PA habits                                                     | No                                     | Provided regular telephone interviews/emails                       | 12 | 0.0  | 39.0 (10.7) <sup>SD</sup> | 41.7 | 27.7 (3.1) <sup>SD</sup> | 79.4 (8.9) <sup>SD</sup>   |
| #21. Hottenrott et al. (2020) <sup>CA</sup> | Germany       | 12 weeks  | 5:2 with placebo (5:2) Consume 400/600 (female/male) kcal on two fasting days and five days of diet that meets energy requirements with placebo | Yes | Personalized endurance training based on heart rate three to four times a week | No                                     | None specified                                                     | 20 | 10.0 | NR                        | NR   | NR                       | NR                         |

|                                                  |             |                                    |                                                                                                                                                                                |     |                                                                                |     |                                    |                 |      |                          |      |                          |                            |
|--------------------------------------------------|-------------|------------------------------------|--------------------------------------------------------------------------------------------------------------------------------------------------------------------------------|-----|--------------------------------------------------------------------------------|-----|------------------------------------|-----------------|------|--------------------------|------|--------------------------|----------------------------|
|                                                  |             |                                    | 5:2 with alkaline supplementation<br>Consume 400/600 (female/male) kcal on two fasting days and five days of diet that meets energy requirements with alkaline supplementation |     | Personalized endurance training based on heart rate three to four times a week | No  | None specified                     | 20              | 15.0 | NR                       | NR   | NR                       | NR                         |
|                                                  |             |                                    | Control with placebo<br>NR                                                                                                                                                     | Yes | Personalized endurance training based on heart rate three to four times a week | No  | None specified                     | 20              | 15.0 | NR                       | NR   | NR                       | NR                         |
|                                                  |             |                                    | Control with alkaline supplementation<br>NR                                                                                                                                    |     | Personalized endurance training based on heart rate three to four times a week | No  | None specified                     | 20              | 20.0 | NR                       | NR   | NR                       | NR                         |
| #22.<br>Corley et al.<br>(2018) <sup>+, CA</sup> | New Zealand | 12 weeks                           | 5:2 with consecutive fasting days<br>Consume ~2092-2510kJ on consecutive fast days two days per week                                                                           | Yes | NR                                                                             | No  | Contacted weekly by phone or email | 19 <sup>a</sup> | 5.3  | 62 (44 to 77)            | 38.9 | 36.6 (5.3) <sup>SD</sup> | 108.7 (20.4) <sup>SD</sup> |
|                                                  |             |                                    | 5:2 with nonconsecutive fasting days<br>Consume ~2092-2510kJ on nonconsecutive fast days two days per week                                                                     |     | NR                                                                             | No  | Contacted weekly by phone or email | 22 <sup>a</sup> | 13.6 | 58 (42 to 74)            | 42.1 | 36.8 (5.2) <sup>SD</sup> | 109.8 (20.3) <sup>SD</sup> |
| #23.<br>Byrne et al.<br>(2018) <sup>ITT</sup>    | Australia   | 30/16 weeks (WOWO /CER) (24 weeks) | WOWO<br>Eight weeks of 67% energy restriction with alternating weeks of energy balance with 100% energy needs                                                                  | Yes | NR                                                                             | Yes | None specified                     | 26              | 26.9 | 39.9 (9.2) <sup>SD</sup> | 0.0  | 34.6 (4.2) <sup>SD</sup> | 109.8 (14.1) <sup>SD</sup> |
|                                                  |             |                                    | CER<br>Consume 67% energy needs                                                                                                                                                |     | NR                                                                             | Yes | None                               | 25              | 12.0 | 39.3                     | 0.0  | 34.4                     | 111.6                      |

|                                                                     |               |                     | daily                                                                                                                                                                                   |     |                                                       |                                        | specified                 |                 |      | (6.6) <sup>SD</sup>       |       | (3.3) <sup>SD</sup>      | (10.0) <sup>SD</sup>      |
|---------------------------------------------------------------------|---------------|---------------------|-----------------------------------------------------------------------------------------------------------------------------------------------------------------------------------------|-----|-------------------------------------------------------|----------------------------------------|---------------------------|-----------------|------|---------------------------|-------|--------------------------|---------------------------|
| #24.<br>Keogh et al. (2014) <sup>CA</sup>                           | Australia     | 52 weeks            | WOWO<br>5500kJ energy restriction for 1 week followed by 1 week of usual diet                                                                                                           | No  | Maintain regular PA habits                            | No                                     | None specified            | 39 <sup>a</sup> | 51.3 | 59.5 (8.7) <sup>SD</sup>  | 100.0 | 33.1 (3.8) <sup>SD</sup> | 86.9 (14.1) <sup>SD</sup> |
|                                                                     |               |                     | CER<br>5500kJ energy restriction every week                                                                                                                                             |     | Maintain regular PA habits                            | No                                     | None specified            | 36 <sup>a</sup> | 52.8 | 60.8 (12.5) <sup>SD</sup> | 100.0 | 33.0 (7.5) <sup>SD</sup> | 90.2 (18.8) <sup>SD</sup> |
| #25 a.<br>Headland et al. (2019) <sup>ITT</sup><br>(weight only)+CA | Australia     | 52 weeks (52 weeks) | 5:2<br>2100kJ/2520kJ (women/men) per day for two consecutive or nonconsecutive days and five days of habitual eating                                                                    | Yes | Advised to increase number of steps per day to 10,000 | No                                     | None specified            | 118             | 58.5 | 47.5 (14.5) <sup>SD</sup> | 77.1  | 32.7 (5.1) <sup>SD</sup> | 88.8 (14.9) <sup>SD</sup> |
|                                                                     |               |                     | WOWO<br>4200kJ/5040kJ (women/men) per day for one week followed by one week of habitual eating                                                                                          |     | Advised to increase number of steps per day to 10,000 | No                                     | None specified            | 110             | 60.0 | 49.0 (13.2) <sup>SD</sup> | 85.5  | 33.3 (5.1) <sup>SD</sup> | 92.6 (17.1) <sup>SD</sup> |
|                                                                     |               |                     | CER<br>30% energy restriction from requirements                                                                                                                                         |     | Advised to increase number of steps per day to 10,000 | No                                     | None specified            | 104             | 49.0 | 51.7 (13.0) <sup>SD</sup> | 81.7  | 32.2 (4.0) <sup>SD</sup> | 88.2 (13.7) <sup>SD</sup> |
| #25 b.<br>Headland et al. (2020) <sup>2nd, CA</sup>                 |               |                     |                                                                                                                                                                                         |     |                                                       |                                        |                           |                 |      |                           |       |                          |                           |
| #25 c.<br>Headland et al. (2019) <sup>X, 2nd, CA</sup>              |               |                     |                                                                                                                                                                                         |     |                                                       |                                        |                           |                 |      |                           |       |                          |                           |
| #26 a.<br>Klempel et al. (2012) <sup>CA</sup>                       | United States | 8 weeks             | 6:1 with liquid meal replacements<br>Six days of calorie-restricted liquid meal replacements for breakfast and lunch (240kcal) and dinner meal (400-600kcal) with one fast day per week | Yes | NR                                                    | Provided liquid meal replacements only | Met with dietitian weekly | 28 <sup>a</sup> | 7.1  | 47.0 (2.0) <sup>SE</sup>  | 100.0 | 35.0 (1.0) <sup>SE</sup> | 95.0 (3.0) <sup>SE</sup>  |
|                                                                     |               |                     | 6:1 with food-based diet<br>Six days of calorie-restricted food-based diet and one fast day per week                                                                                    |     | NR                                                    | No                                     | Met with dietitian weekly | 26 <sup>a</sup> | 15.4 | 48.0 (2.0) <sup>SE</sup>  | 100.0 | 35.0 (1.0) <sup>SE</sup> | 94.0 (3.0) <sup>SE</sup>  |
| #26 b.<br>Kroegar et al. (2012) <sup>CA</sup>                       |               |                     |                                                                                                                                                                                         |     |                                                       |                                        |                           |                 |      |                           |       |                          |                           |
| #27.<br>Chow et                                                     | United States | 12 weeks            | TRF<br>Self-selected 8 hour eating period with ad libitum intake                                                                                                                        | No  | NR                                                    | No                                     | Notified by phone call,   | 13 <sup>a</sup> | 15.4 | 46.5 (12.4) <sup>SD</sup> | 81.8  | 33.8 (7.6) <sup>SD</sup> | 95.2 (22.6) <sup>SD</sup> |

|                             |  |  |                                        |  |    |    |                                                          |                |     |                              |      |                             |                               |
|-----------------------------|--|--|----------------------------------------|--|----|----|----------------------------------------------------------|----------------|-----|------------------------------|------|-----------------------------|-------------------------------|
| al.<br>(2020) <sup>CA</sup> |  |  |                                        |  |    |    | email, text of compliance                                |                |     |                              |      |                             |                               |
|                             |  |  | Control<br>ad libitum per usual habits |  | NR | No | Notified by phone call, email, text of logging adherence | 9 <sup>a</sup> | 0.0 | 44.2<br>(12.3) <sup>SD</sup> | 88.9 | 34.4<br>(7.8) <sup>SD</sup> | 100.9<br>(28.1) <sup>SD</sup> |

<sup>1</sup> = randomized; <sup>2</sup> = from randomized population to end of weight loss and/or weight maintenance phase, attrition for follow-up not included

<sup>X</sup> = sub sample from parent study; <sup>2nd</sup> = secondary analysis; <sup>ITT</sup> = intention-to-treat analysis; <sup>CA</sup> = completer's analysis; <sup>+</sup> = participants with type 2 DM; <sup>\*</sup> = participants with metabolic syndrome; <sup>#</sup> = participants characterized as insulin resistant; <sup>^</sup> = inclusion criteria BMI >23

<sup>a</sup> = baseline data of completers only, baseline data of all randomized participants are not available; <sup>SD</sup> = standard deviation; <sup>SE</sup> = standard error; NR = not reported; PA = physical activity

ADF = participants randomized into a form of the alternate day fasting eating pattern; 5:2 = participants randomized into a form of the 5:2 eating pattern; WOWO = participants randomized into a form of the week on and week off eating pattern; Control = participants with no prescribed diet interventions, participants were informed to maintain their usual diet; 6:1 = six days of restricted or ad libitum intake with one day of fasting; TRF = time restricted fasting eating pattern

## References

- #1. Pavaresh, A., Razavi, R., Abbasi, B., Yaghoobloo, K., Hassanzadeh, A., Mohammadifard, N., Safavi, S. M., Hadi, A., & Clark, C. C. (2019). Modified alternate-day fasting vs. calorie restriction in the treatment of patients with metabolic syndrome: A randomized clinical trial. *Complementary therapies in medicine*, 47, 102187.
- #2. Beaulieu, K., Casanova, N., Oustric, P., Turicchi, J., Gibbons, C., Hopkins, M., Varady, K., Blundell, J., & Finlayson, G. (2020). Matched weight loss through intermittent or continuous energy restriction does not lead to compensatory increases in appetite and eating behavior in a randomized controlled trial in women with overweight and obesity. *The Journal of nutrition*, 150(3), 623-633.
- #3. Catenacci, V. A., Pan, Z., Ostendorf, D., Brannon, S., Gozansky, W. S., Mattson, M. P., Martin, B., MacLean, P. S., Melanson, E. L., & Troy Donahoo, W. (2016). A randomized pilot study comparing zero- calorie alternate- day fasting to daily caloric restriction in adults with obesity. *Obesity*, 24(9), 1874-1883.
- #4. Coutinho, S. R., Halset, E. H., Gåsbakk, S., Rehfeld, J. F., Kulseng, B., Truby, H., & Martins, C. (2018). Compensatory mechanisms activated with intermittent energy restriction: a randomized control trial. *Clinical Nutrition*, 37(3), 815-823.
- #5 a. Hutchison, A. T., Liu, B., Wood, R. E., Vincent, A. D., Thompson, C. H., O'Callaghan, N. J., Wittert, G. A., & Heilbronn, L. K. (2019). Effects of intermittent versus continuous energy intakes on insulin sensitivity and metabolic risk in women with overweight. *Obesity*, 27(1), 50-58.
- #5 b. Liu, B., Hutchison, A. T., Thompson, C. H., Lange, K., & Heilbronn, L. K. (2019). Markers of adipose tissue inflammation are transiently elevated during intermittent fasting in women who are overweight or obese. *Obesity research & clinical practice*, 13(4), 408-415.
- #6. Bowen, J., Brindal, E., James-Martin, G., & Noakes, M. (2018). Randomized trial of a high protein, partial meal replacement program with or without alternate day fasting: similar effects on weight loss, retention status, nutritional, metabolic, and behavioral outcomes. *Nutrients*, 10(9), 1145.
- #7. Razavi, R., Parvaresh, A., Abbasi, B., Yaghoobloo, K., Hassanzadeh, A., Mohammadifard, N., Clark, C. C., & Safavi, S. M. (2020). The alternate-day fasting diet is a more effective approach than a calorie restriction diet on weight loss and hs-CRP levels. *International Journal for Vitamin and Nutrition Research*.
- #8 a. Trepanowski, J. F., Kroeger, C. M., Barnosky, A., Klempel, M. C., Bhutani, S., Hoddy, K., Gabel, K., Freels, S., Rigdon, J., & Rood, J. (2017). Effect of alternate-day fasting on weight loss, weight maintenance, and cardioprotection among metabolically healthy obese adults: a randomized clinical trial. *JAMA internal medicine*, 177(7), 930-938.

- #8 b. Trepanowski, J. F., Kroeger, C. M., Barnosky, A., Klempel, M., Bhutani, S., Hoddy, K. K., Rood, J., Ravussin, E., & Varady, K. A. (2018). Effects of alternate-day fasting or daily calorie restriction on body composition, fat distribution, and circulating adipokines: secondary analysis of a randomized controlled trial. *Clinical Nutrition*, 37(6), 1871-1878.
- #8 c. Barnosky, A., Kroeger, C. M., Trepanowski, J. F., Klempel, M. C., Bhutani, S., Hoddy, K. K., Gabel, K., Shapses, S. A., & Varady, K. A. (2017). Effect of alternate day fasting on markers of bone metabolism: an exploratory analysis of a 6-month randomized controlled trial. *Nutrition and healthy aging*, 4(3), 255-263.
- #8 d. Gabel, K., Kroeger, C. M., Trepanowski, J. F., Hoddy, K. K., Cienfuegos, S., Kalam, F., & Varady, K. A. (2019). Differential Effects of Alternate-Day Fasting Versus Daily Calorie Restriction on Insulin Resistance. *Obesity (Silver Spring, Md.)*, 27(9), 1443-1450.
- #8 e. Miranda, E. R., Fuller, K. N., Perkins, R. K., Kroeger, C. M., Trepanowski, J. F., Varady, K. A., & Haus, J. M. (2018). Endogenous secretory RAGE increases with improvements in body composition and is associated with markers of adipocyte health. *Nutrition, metabolism and cardiovascular diseases*, 28(11), 1155-1165.
- #9. Varady, K. A., Bhutani, S., Klempel, M. C., & Kroeger, C. M. (2011). Comparison of effects of diet versus exercise weight loss regimens on LDL and HDL particle size in obese adults. *Lipids in Health and Disease*, 10(1), 1-5.
- #10 a. Bhutani, S., Klempel, M. C., Kroeger, C. M., Trepanowski, J. F., & Varady, K. A. (2013). Alternate day fasting and endurance exercise combine to reduce body weight and favorably alter plasma lipids in obese humans. *Obesity*, 21(7), 1370-1379.
- #10 b. Bhutani, S., Klempel, M. C., Kroeger, C. M., Aggour, E., Calvo, Y., Trepanowski, J. F., Hoddy, K. K., & Varady, K. A. (2013). Effect of exercising while fasting on eating behaviors and food intake. *Journal of the International Society of Sports Nutrition*, 10(1), 1-8.
- #10 c. Bhutani, S., Klempel, M. C., Kroeger, C. M., Trepanowski, J., Phillips, S. A., Norkeviciute, E., & Varady, K. A. (2013). Alternate day fasting with or without exercise: effects on endothelial function and adipokines in obese humans. *e-SPEN Journal*, 8(5), e205-e209.
- #11. Cho, A.-R., Moon, J.-Y., Kim, S., An, K.-Y., Oh, M., Jeon, J. Y., Jung, D.-H., Choi, M. H., & Lee, J.-W. (2019). Effects of alternate day fasting and exercise on cholesterol metabolism in overweight or obese adults: a pilot randomized controlled trial. *Metabolism*, 93, 52-60.
- #12. Hoddy, K. K., Kroeger, C. M., Trepanowski, J. F., Barnosky, A., Bhutani, S., & Varady, K. A. (2014). Meal timing during alternate day fasting: Impact on body weight and cardiovascular disease risk in obese adults. *Obesity*, 22(12), 2524-2531.

- #13 a. Klempel, M. C., Kroeger, C. M., & Varady, K. A. (2013). Alternate day fasting (ADF) with a high-fat diet produces similar weight loss and cardio-protection as ADF with a low-fat diet. *Metabolism*, 62(1), 137-143.
- #13 b. Klempel, M., Kroeger, C., & Varady, K. (2013). Alternate day fasting increases LDL particle size independently of dietary fat content in obese humans. *European journal of clinical nutrition*, 67(7), 783-785.
- #13 c. Klempel, M., Kroeger, C., Norkeviciute, E., Goslawski, M., Phillips, S., & Varady, K. (2013). Benefit of a low-fat over high-fat diet on vascular health during alternate day fasting. *Nutrition & diabetes*, 3(5), e71-e71.
- #13 d. Varady, K. A., Dam, V. T., Klempel, M. C., Horne, M., Cruz, R., Kroeger, C. M., & Santosa, S. (2015). Effects of weight loss via high fat vs. low fat alternate day fasting diets on free fatty acid profiles. *Scientific Reports*, 5(1), 1-7.
- #14. Antoni, R., Johnston, K. L., Collins, A. L., & Robertson, M. D. (2018). Intermittent v. continuous energy restriction: differential effects on postprandial glucose and lipid metabolism following matched weight loss in overweight/obese participants. *British Journal of Nutrition*, 119(5), 507-516.
- #15 a. Carter, S., Clifton, P. M., & Keogh, J. B. (2018). Effect of intermittent compared with continuous energy restricted diet on glycemic control in patients with type 2 diabetes: a randomized noninferiority trial. *JAMA network open*, 1(3), e180756-e180756.
- #15 b. Carter, S., Clifton, P., & Keogh, J. (2019). The effect of intermittent compared with continuous energy restriction on glycaemic control in patients with type 2 diabetes: 24-month follow-up of a randomised noninferiority trial. *Diabetes Research and Clinical Practice*, 151, 11-19.
- #16. Carter, S., Clifton, P., & Keogh, J. (2016). The effects of intermittent compared to continuous energy restriction on glycaemic control in type 2 diabetes; a pragmatic pilot trial. *Diabetes Research and Clinical Practice*, 122, 106-112.
- #17. Conley, M., Le Fevre, L., Haywood, C., & Proietto, J. (2018). Is two days of intermittent energy restriction per week a feasible weight loss approach in obese males? A randomised pilot study. *Nutrition & Dietetics*, 75(1), 65-72.
- #18. Schübel, R., Nattenmüller, J., Sookthai, D., Nonnenmacher, T., Graf, M. E., Riedl, L., Schlett, C. L., Von Stackelberg, O., Johnson, T., & Nabers, D. (2018). Effects of intermittent and continuous calorie restriction on body weight and metabolism over 50 wk: a randomized controlled trial. *The American journal of clinical nutrition*, 108(5), 933-945.
- #19 a. Sundfør, T., Svendsen, M., & Tonstad, S. (2018). Effect of intermittent versus continuous energy restriction on weight loss, maintenance and cardiometabolic risk: a randomized 1-year trial. *Nutrition, metabolism and cardiovascular diseases*, 28(7), 698-706.

- #19 b. Sundfør, T., Tonstad, S., & Svendsen, M. (2019). Effects of intermittent versus continuous energy restriction for weight loss on diet quality and eating behavior. A randomized trial. *European journal of clinical nutrition*, 73(7), 1006-1014.
- #20. Hirsh, S. P., Pons, M., Joyal, S. V., & Swick, A. G. (2019). Avoiding holiday seasonal weight gain with nutrient-supported intermittent energy restriction: a pilot study. *Journal of nutritional science*, 8.
- #21. Hottenrott, K., Werner, T., Hottenrott, L., Meyer, T. P., & Vormann, J. (2020). Exercise Training, Intermittent Fasting and Alkaline Supplementation as an Effective Strategy for Body Weight Loss: A 12-Week Placebo-Controlled Double-Blind Intervention with Overweight Subjects. *Life*, 10(5), 74.
- #22. Corley, B., Carroll, R., Hall, R., Weatherall, M., Parry- Strong, A., & Krebs, J. (2018). Intermittent fasting in type 2 diabetes mellitus and the risk of hypoglycaemia: a randomized controlled trial. *Diabetic Medicine*, 35(5), 588-594.
- #23. Byrne, N. M., Sainsbury, A., King, N., Hills, A., & Wood, R. (2018). Intermittent energy restriction improves weight loss efficiency in obese men: the MATADOR study. *International journal of obesity*, 42(2), 129-138.
- #24. Keogh, J., Pedersen, E., Petersen, K., & Clifton, P. (2014). Effects of intermittent compared to continuous energy restriction on short- term weight loss and long- term weight loss maintenance. *Clinical obesity*, 4(3), 150-156.
- #25 a. Headland, M. L., Clifton, P. M., & Keogh, J. B. (2019). Effect of intermittent compared to continuous energy restriction on weight loss and weight maintenance after 12 months in healthy overweight or obese adults. *International Journal of Obesity*, 43(10), 2028-2036.
- #25 b. Headland, M. L., Clifton, P. M., & Keogh, J. B. (2020). Impact of intermittent vs. continuous energy restriction on weight and cardiometabolic factors: a 12-month follow-up. *International Journal of Obesity*, 44(6), 1236-1242.
- #25 c. Headland, M. L., Clifton, P. M., & Keogh, J. B. (2019). Effects of Weight Loss on FGF-21 in Human Subjects: An Exploratory Study. *International journal of environmental research and public health*, 16(23), 4877.
- #26 a. Klempel, M. C., Kroeger, C. M., Bhutani, S., Trepanowski, J. F., & Varady, K. A. (2012). Intermittent fasting combined with calorie restriction is effective for weight loss and cardio-protection in obese women. *Nutrition journal*, 11(1), 1-9.
- #26 b. Kroeger, C. M., Klempel, M. C., Bhutani, S., Trepanowski, J. F., Tangney, C. C., & Varady, K. A. (2012). Improvement in coronary heart disease risk factors during an intermittent fasting/calorie restriction regimen: Relationship to adipokine modulations. *Nutrition & Metabolism*, 9(1), 1-8.
- #27. Chow, L. S., Manoogian, E. N., Alvear, A., Fleischer, J. G., Thor, H., Dietsche, K., Wang, Q., Hodges, J. S., Esch, N., & Malaeb, S. (2020). Time- restricted eating effects on body



composition and metabolic measures in humans who are overweight: a feasibility study.  
*Obesity*, 28(5), 860-869.
